1 **TITLE: Low basal expression and slow induction of IFITM3 puts immune**  
2 **cells at risk of influenza A infection**

3

4 **Running head (40 characters):**

5 Cells at risk of Influenza A infection

6

7 **Authors:**

8 Dannielle Wellington<sup>1,2,\*</sup>, , Zixi Yin<sup>1,2</sup>, Liwei Zhang<sup>1</sup>, Jessica Forbester<sup>1,3</sup>, Kerry  
9 Kite<sup>1</sup>, Henry Laurenson-Schafer<sup>1</sup>, Shokouh Makvandi-Nejad<sup>1</sup>, Boquan Jin<sup>4</sup>,  
10 Emma Bowes<sup>5</sup>, Krishnageetha Manoharan<sup>5</sup>, David Maldonado-Perez<sup>5</sup>, Clare  
11 Verill<sup>5</sup>, Ian Humphreys<sup>3</sup> & Tao Dong<sup>1,2,\*</sup>

12 <sup>1</sup>. MRC Human Immunology Unit, MRC Weatherall Institute of Molecular Medicine, Radcliffe  
13 Department of Medicine, Oxford University, Oxford OX3 9DS, UK

14 <sup>2</sup>. Chinese Academy of Medical Sciences (CAMS) Oxford Institute, Nuffield Department of  
15 Medicine, Oxford University, OX3 7BN, UK

16 <sup>3</sup>. Division of Infection and Immunity/Systems Immunity University Research Institute, Cardiff  
17 University, Cardiff, CF14 4XN, UK

18 <sup>4</sup>. Fourth Military Medical University, Xian, China

19 <sup>5</sup>. Oxford Radcliffe Biobank, Nuffield Department of Surgical Sciences, Oxford University,  
20 Oxford OX3 9DU, UK

21 \*Corresponding to Dannielle Wellington [dannielle.wellington@rdm.ox.ac.uk](mailto:dannielle.wellington@rdm.ox.ac.uk) or Tao Dong,  
22 [tao.dong@imm.ox.ac.uk](mailto:tao.dong@imm.ox.ac.uk)

23

24 **Acknowledgements:**

25 The authors would like to thank the following facilities and individuals within  
26 the MRC Weatherall Institute (Oxford) for their invaluable help in the following  
27 experiments: Mass Cytometry Facility and Alain Townsend for kindly providing  
28 virus stocks. The Wellcome Trust Sanger Institute was the source of the Kolf2  
29 cell line which was generated under the Human Induced Pluripotent Stem Cell  
30 Initiative funded by a grant from the Wellcome Trust and Medical Research  
31 Council, supported by the Wellcome Trust (WT098051) and the  
32 NIHR/Wellcome Trust Clinical Research Facility, and Life Science  
33 Technologies Corporation provided Cytotune for reprogramming. The  
34 Wellcome Trust Sanger Institute core gene-editing pipeline generated IFITM3-  
35 <sup>-/-</sup> iPSC lines. Figure 2 was created with Biorender.

36

37 **Funding:**

38 This work was funded by Chinese Academy of Medical Sciences (CAMS)  
39 Innovation Fund for Medical Sciences (CIFMS), China (grant number: 2018-

40 I2M-2-002 and 2017PT31043) and Medical Research Council, United  
41 Kingdom (MR/L018942/1 and MRC Human Immunology Unit Core).

42

43 **Contributions:**

44 T.D. conceived the project. D.W. designed the experiments and performed the  
45 mass cytometry experiments. D.W., Z.Y., L.Z. and K.K. ran the Western blots  
46 for IFITM3 expression. Z.Y. performed the influenza experiments under the  
47 supervision of T.D. and D.W. J.F. cultured and differentiated the iPS cells.  
48 S.M.N. and B.J. generated the IFITM3-specific antibody. E.B. and K.M. were  
49 responsible for the lung tissue collection and sampling, while D.M.P. recruited  
50 the patients. D.W. analysed the data and wrote the manuscript, which is  
51 edited by T.D. and I.H prior to comment and approval by all authors.

52

53 **Keywords:**

54 IFITM3, Influenza, Influenza A virus, interferon, viral tropism, interferon-  
55 stimulated gene

56

57 **Competing Interests**

58 The authors have no competing interests to declare.

59

60 **Abstract**

61 The interferon-induced transmembrane protein, IFITM3, has been shown to  
62 restrict influenza virus infection in murine and *in vitro* settings for ten years,  
63 but no explanation has been found to explain why this virus infection is so  
64 highly contagious and infects most individuals it comes in contact with. We  
65 confirm that the expression level of IFITM3 plays a role in determining the  
66 level of viral infection through manipulation of IFITM3 levels with interferon  
67 (IFN) stimulation and overexpression systems. Low basal expression may put  
68 some immune cells, including lymphocytes and lung-resident macrophages,  
69 at risk of influenza virus infection. Investigating the induction of IFITM3 by  
70 IFN, we find a strong preference for Type I IFN in IFITM3 induction in both cell  
71 lines and primary human cells. While myeloid cells can increase expression  
72 following stimulation by Type I IFN, lymphocytes show minimal induction of  
73 IFITM3 following IFN stimulation, suggesting that they are always at risk of  
74 viral infection. Surprisingly, we found that the time it takes for maximal  
75 induction of IFITM3 is relatively slow for an interferon-stimulated gene at  
76 around 36 hours. Low basal expression and slow induction of IFITM3 could  
77 increase the risk of influenza virus infection in selected immune cells.

78

79 **Importance**

80 Influenza virus infection remains one of the top ten threats to global health,  
81 causing significant deaths and hospitalisations across the world each year.  
82 Understanding mechanisms for controlling influenza virus infection remain a  
83 priority. The interferon-induced transmembrane protein IFITM3 can restrict  
84 influenza infection by limiting replication of the virus. The precise  
85 mechanisms of how IFITM3 reduced replication of influenza are unknown,  
86 although it is predicted to prevent release of viral contents into the cytosol by  
87 preventing pore formation on the endosomal compartments where it is  
88 suggested to reside. Here we have shown that the expression level of IFITM3  
89 is important in determining the control of influenza virus infection. We find an  
90 expression pattern for IFITM3 that varies based on cell type, tissue locality,  
91 differentiation state and cell naivety, all of which highlights cells that may be at  
92 the highest risk of influenza infection.

93

## 94 **Introduction**

95 Influenza virus infection is highly contagious, spreading quickly among  
96 individuals in a community, posing one of the greatest infectious threats to  
97 modern society. Despite high infection rates, mortality rates remain lower  
98 than 1% during non-pandemic years showing that the host immune system  
99 can effectively clear viral infection in most cases (WHO figures). But the very  
100 young and very old are vulnerable and at higher risk of hospitalisation and  
101 mortality. Studies into host factors that may be important in restriction of this  
102 highly pathogenic virus led to the discovery of the interferon (IFN) induced  
103 trans-membrane protein 3 (IFITM3) ten years ago.

104 IFITM3 was found to limit infection of influenza A virus (IAV) in an  
105 expression level dependent manner (1) and was integral for the overall  
106 clearance of infection in a murine setting (2). The fact that most, if not all,  
107 individuals who come into contact with IAV become actively infected suggests  
108 that basal expression of IFITM3 in hosts is not sufficient to control IAV in the  
109 early stages of an infection. Bringing into question whether this anti-viral host  
110 response is an innate factor or induced to help at later stages of an infection.

111 Previous reports on IFITM3 expression have demonstrated basal  
112 expression in the mouse upper and lower airways of the lung, visceral pleura  
113 and tissue-resident leukocytes, with a marked induction in expression with  
114 type I and II IFNs but not type III (2). Additionally, following IAV infection in  
115 mice, IAV-specific tissue-resident memory T cells in the lung mucosa can  
116 withstand viral infection during a second challenge by maintaining expression  
117 of IFITM3 (3).

118 Recently, it has been demonstrated that IFITM3 expression, along with  
119 several other IFN-stimulated genes (ISG), is high in stem cells potentially as a  
120 protection mechanism against viral infection, with expression then lost with  
121 differentiation (4). Online databases of IFITM3 RNA expression show large  
122 variability in expression in different organs. The protein atlas database  
123 suggests that protein levels of IFITM3 are also variable across cell types,  
124 however it is likely that these results came from studies using antibodies that  
125 were cross-reactive with IFITM2 making it impossible to draw firm conclusions  
126 on the expression pattern and induction of IFITM3 (5, 6).

127 In addition to restriction of IAV, IFITM3 has been shown to restrict an  
128 additional sixteen mostly enveloped RNA viruses including human  
129 immunodeficiency virus 1 (HIV-1), Ebola and Dengue virus (1, 7-10). The  
130 tropism of these IFITM3-restricted viruses is highly varied; IAV predominantly  
131 epithelial cells of the respiratory system (11), HIV-1 predominantly infects  
132 CD4<sup>+</sup> T cells (12, 13) and Dengue virus can infect skin epithelial and  
133 Langerhans cells (14, 15). Differences in basal IFITM3 expression may  
134 contribute to the tropism exhibited by these viruses and others restricted by  
135 IFITM3.

136 We have generated an N-terminal antibody specific to IFITM3 (16),  
137 affording a unique opportunity to investigate the basal expression level of  
138 IFITM3 in different cell types. We find that basal expression of IFITM3  
139 significantly varies depending on cell type but generally follows the rule that  
140 myeloid cells express higher levels than lymphocytes. In addition, we  
141 investigate the induction of IFITM3 following IFN stimulation, highlighting a  
142 clear preference for Type I IFN.

143

## 144 **Methods**

### 145 **Study Subjects & Cell culture**

146 Peripheral blood mononuclear cells (PBMC) were isolated from a total of three  
147 healthy UK volunteers (2 female, 1 male; aged 27-32 years) by Ficoll hypaque  
148 separation (Sigma Aldrich). Cord blood from three donors (2 female, 1 male)  
149 was obtained through the NHS Blood & Transfusion service and PBMC were  
150 isolated as above. Para-tumour lung tissue samples from metastatic cancer  
151 or fibrosis patients were processed using a tumour dissociation kit (MACS  
152 Miltenyi Biotec) to isolate immune and epithelial cells. These tissue samples  
153 were deemed to show no visible signs of inflammation by a pathologist. The  
154 cell lines HEK293, A549 and induced pluripotent stem cells (iPSC) were  
155 utilised from lab stocks.

156 PBMCs were cultured in RPMI (Lonza) while HEK293 and A549 cells  
157 were cultured in DMEM (Sigma). Both were supplemented with 10% foetal  
158 calf serum (Sigma), penicillin-streptomycin (Sigma) and 2mM L-glutamine  
159 (Sigma). All cells were cultured at 37°C and 5% CO<sub>2</sub>.

160 The healthy control human iPSC line Kolf2 was acquired through the  
161 Human Induced Pluripotent Stem Cells Initiative Consortium (HipSci;  
162 [www.hipsci.org](http://www.hipsci.org)), through which they were also characterized (17). Consent  
163 was obtained for the use of cell lines for the HipSci project from healthy  
164 volunteers. A favourable ethical opinion was granted by the National  
165 Research Ethics Service (NRES) Research Ethics Committee Yorkshire and  
166 The Humber – Leeds West, reference number 15/YH/0391. Prior to  
167 differentiation, iPSCs were grown feeder-free using the Essential 8 Flex  
168 Medium kit (Thermo Fisher Scientific) on Vitronectin (VTN-N, Thermo Fisher  
169 Scientific) coated plates as per manufacturer's instructions to 70-80%  
170 confluency. iPSCs were harvested for differentiation using Versene solution  
171 (Thermo Fisher Scientific).

172

### 173 **Generation of IFITM3<sup>-/-</sup> iPSCs**

174 The knockout of IFITM3\_F01 was generated by a single T base insertion in  
175 the first exon using CRISPR/Cas9 in the Kolf2\_C1 human iPSC line (a clonal  
176 derivative of kolf2 (HipSci)). This was achieved by nucleofection of 10<sup>6</sup> cells  
177 with Cas9-crRNA-tracrRNA ribonucleoprotein (RNP) complexes. Synthetic  
178 RNA oligonucleotides (target site: 5'- TGGGGCCATACGCACCTTCA CGG,  
179 WGE CRISPR ID: 1077000641, 225 pmol crRNA/tracrRNA) were annealed  
180 by heating to 95°C for 2 min in duplex buffer (IDT) and cooling slowly,  
181 followed by addition of 122 pmol recombinant eSpCas9\_1.1 protein (in 10 mM  
182 Tris-HCl, pH 7.4, 300 mM NaCl, 0.1 mM EDTA, 1 mM DTT). Complexes were  
183 incubated at room temperature for 20 minutes before electroporation. After  
184 recovery, cells were plated at single cell density and colonies were picked into  
185 96 well plates. 96 clones were screened for heterozygous and homozygous  
186 mutations by high throughput sequencing of amplicons spanning the target  
187 site using an Illumina MiSeq instrument. Final cell lines were further validated  
188 by Illumina MiSeq. Two homozygous targeted clones were used in  
189 downstream differentiation assays.

190 IFITM3<sup>-/-</sup> HEK293 and A549 were generated as previously described (16).

191

### 192 **Differentiation of iPSCs to macrophages**

193 To differentiate iPSCs to iPSC-derived macrophages (iPSC-Mac), the  
194 approach of Hale *et al* (18) and van Wilgenburg *et al* (19) was modified.  
195 Briefly, upon reaching confluency, human iPSCs were collected and  
196 transferred into Essential 8 Flex medium supplemented with 50 ng/mL BMP-4  
197 (Bio-Techne), 20 ng/mL SCF (Bio-Techne) and 50 ng/mL VEGF (Peprotech  
198 EC Ltd.) in ultra-low attachment plates (Corning) for 4 days to generate  
199 Embryoid Bodies (EBs). On day 5, EBs were used for generation of myeloid  
200 precursor cells by plating into 6-well tissue culture treated plates (Corning)  
201 coated for two hours at room temperature with 0.1% gelatin, in X-VIVO-15  
202 media supplemented with 25 ng/mL IL-3 (Bio-Techne) and 50 ng/mL M-CSF  
203 (Bio-Techne). After several weeks, floating myeloid precursors were  
204 harvested and terminally differentiated into matured macrophages in the  
205 presence of higher concentrations of M-CSF (100 ng/mL) for 7 days. For  
206 protein harvests macrophages were detached using Lidocaine solution  
207 (4 mg/mL lidocaine-HCl with 10 mM EDTA in PBS).

208

### 209 **IFN Stimulation**

210 All IFNs used were sourced from *PBL Assay Science*. A concentration of 250  
211 U/ml was used for cell stimulation unless stated in the figure legend. IFN-  
212 alpha 2 (Alpha 2b) (Cat.No. 11105-1), IFN-beta 1a (Cat.No. 11415-1), IFN-  
213 gamma (Cat.No. 11500-2) and IFN-lambda 3 (IL-28B) (Cat.No.11730-1).

214

### 215 **Western Blot analysis of IFITM3 protein expression**

216 For Western blot analysis of IFITM3 expression, cells were homogenised  
217 using RIPA lysis buffer (Thermo Fisher Scientific) supplemented with 10 µl/ml  
218 protease inhibitor (Thermo Fisher Scientific). Lysate was combined with  
219 reducing loading sample buffer and loaded on a 15% Acrylamide gel. Gels  
220 were blotted onto nitrocellulose membrane by running at 26V for 1 hour 15  
221 minutes. Anti-GAPDH Antibody clone 6C5 (Merck Millipore, MAB374) was  
222 used as a control antibody; our in house anti-IFITM3 antibody (XA254.3) was  
223 used for IFITM3 detection (16). Primary antibodies were probed with IRDye  
224 680LT Goat Anti-Mouse (Li-Cor, 926-68020) and visualised using the Li-Cor  
225 Odyssey Imaging System.



226 Images from Western blot experiments were analysed by Fiji software  
227 for band density and expressed in GraphPad Prism as either a percentage of  
228 the GAPDH expression or as a relative amount of IFITM3 compared to a  
229 selected time point (72 hours). A one-way ANOVA was performed along with  
230 Tukey's or Sidak's multiple comparisons tests to measure statistical  
231 differences between cell lines.

232

### 233 **Mass Cytometry staining for ISG expression**

234 Purified antibodies against IFITM3 (in-house clone), STAT1 (clone 246123),  
235 CD90 (clone 5E10) and CD38 (clone HIT2) were conjugated in-house using  
236 the Maxpar X8 Multi-Metal Labeling Kit (Fluidigm) according to the  
237 manufacturer's instructions. The following antibodies were purchase directly  
238 conjugated from Fluidigm: EpCAM-141Pr (clone 9C4); CD31-151Eu (clone  
239 EPR3094); CD68-159Tb (clone KP1); Siglec 8-164Dy (clone 7C9); and BST2-  
240 PE (clone RS38E). All other antibodies were utilised from stocks provided by  
241 the Mass Cytometry Facility (WIMM, University of Oxford). Details are  
242 available on request.

243 To test for reproducibility between CyTOF runs, the same donor was  
244 included in each run. 100 mL of heparinized blood was drawn from a healthy  
245 control donor, PBMCs were isolated and aliquots were frozen (90% fetal  
246 bovine serum+10% dimethyl sulfoxide) and stored in liquid nitrogen until use.  
247 With every CyTOF run 1 vial was thawed for staining and acquisition.

248 Donor cells were re-suspended at  $1 \times 10^7$  cells/mL and stained with 5  
249 mmol/L Cisplatin (Fluidigm; live/dead) and surface antibody cocktail. Cells  
250 were permeabilised with Maxpar nuclear antigen staining buffer and stained  
251 with intracellular markers and the metal-conjugated secondary to BST2-PE.  
252 An un-permeabilised control without secondary antibody was treated with cell  
253 staining buffer and stained with intracellular antibodies. Cells were stained  
254 with 125 nM Ir-Intercalator (Fluidigm) according to Fluidigm protocols and  
255 fixed with 1.6% formaldehyde. Cells were counted on a BD Accuri C6. Before  
256 acquisition on CyTOF Helios cytometer (Fluidigm), cells were re-suspended at  
257  $2 \times 10^6$  cells/mL in 0.1×EQ Four Element Calibration Beads (Fluidigm). Data  
258 files were processed and normalised using the CyTOF software v6.7  
259 (Fluidigm).



260

## 261 **Mass cytometry Analysis**

262 CyTOF files (.fcs format) were imported into FlowJo 10.5.2 (Treestar Inc).  
263 Live single cells were identified using the gating strategy: 191Ir<sup>+</sup> 140Ce<sup>-</sup>;  
264 Singlets were identified from 191Ir v event length plots; Live cells were 191Ir<sup>+</sup>  
265 195Pt<sup>-</sup>. For lung tissue samples, epithelial cells were identified as CD45<sup>-</sup>  
266 EpCAM<sup>+</sup>. For cord blood a further gating step was performed to separate the  
267 CD34<sup>+</sup> cells from the CD34<sup>-</sup> cells. CD34<sup>+</sup> cells were further gated to identify  
268 the various progenitor populations: HSC CD38<sup>-</sup> CD90<sup>+</sup>; MPP CD38<sup>-</sup> CD90<sup>-</sup>;  
269 MLP CD38<sup>-</sup> CD90<sup>-</sup> CD10<sup>+</sup>; LMPP CD39<sup>-</sup> CD90<sup>-</sup> CD10<sup>-</sup>; MLP CD38<sup>+</sup> CD123<sup>-</sup>  
270 CD10<sup>-</sup>; CMP/GMP CD38<sup>+</sup> CD123<sup>+</sup> CD10<sup>-</sup>; B/NK Progenitor CD38<sup>+</sup> CD10<sup>+</sup>  
271 CD123<sup>-</sup>.

272 For each group (CD34<sup>-</sup> cord blood PBMC, CD45<sup>+</sup> lung cells or live  
273 adult PBMC) files were downsampled to maximum 250,000 cells per donor or  
274 condition, concatenated and exported into one data file. An UMAP analysis  
275 was run on each concatenated file using the phenotypic markers.  
276 Visualisation of UMAP parameters allowed identification of distinct immune  
277 cell subsets. Individual samples were identified by gating on event length v  
278 sample ID. For each individual sample, the median value was determined for  
279 IFITM3, BST2 and STAT1. This raw data was plotted on column or grouped  
280 graphs in GraphPad Prism. Statistical analysis was completed using t-tests,  
281 and one- or two-way ANOVA.

282

## 283 **Influenza A virus infection of HEK293 cells**

284 HEK293 cells were plated into a 6-well dish and pre-stimulated with 250U/ml  
285 IFN for 24 hours prior to infection with pseudotyped S-FLU (PR8:H1N1)  
286 reporter virus at a ratio of 1:4 for 24 hours. Infected cells were then  
287 harvested, stained with live dead stain (Zombie-violet, Thermo Fisher  
288 Scientific) and the percentage of GFP<sup>+</sup> (produced when the virus replicates)  
289 cells was determined. Data is shown as a percentage of the WT infection  
290 level.

291 HEK293 IFITM3<sup>-/-</sup> cells were plated in a 6-well dish for 24 hours prior to  
292 transfection of IFITM3-pcDNA3.1 plasmid DNA using FuGene 6 reagent  
293 (Promega) at a ratio of 3:1. Cells were harvested after 24 hours and split into

294 three Eppendorf tubes: one was immediately stained for IFITM3 expression  
295 and run on a flow cytometer (Attune NxT); one was infected with S-FLU  
296 (PR8:H1N1) at a ratio of 1:4; and the other was left uninfected. Cells were  
297 plated into 24 well dishes for 24 hours. The level of IFITM3 expression and  
298 GFP<sup>+</sup> percentage of cells was determined for each condition. Data was  
299 analysed by linear correlation on GraphPad Prism.

300

## 301 **Results**

### 302 ***Basal IFITM3 expression varies across common cell lines***

303 Using our IFITM3-specific antibody, we investigated the basal expression of  
304 IFITM3 on the cell lines HEK293, A549 and the induced pluripotent stem cell  
305 (iPSC) line Kolf2. These cell lines were selected as we have CRISPR-edited  
306 *IFITM3*<sup>-/-</sup> versions of these cells, allowing us to be confident that the level of  
307 IFITM3 expression observed is accurate (**Figure 1a**).

308 Basal expression of IFITM3 was shown to vary across the three cell  
309 lines with no detectable expression in A549 cells and higher expression in  
310 iPSC than HEK293 cells (**Figure 1b**). Following differentiation of iPSC into  
311 macrophages, IFITM3 basal expression was reduced compared to iPSC.  
312 This suggests that IFITM3 expression levels can be altered due to the  
313 differentiation state of the cell or cell type.

314

### 315 ***Basal IFITM3 expression varies due to cell type in primary samples***

316 To investigate whether differences in IFITM3 basal expression were present  
317 in primary cells from blood and mucosal tissue, we isolated peripheral blood  
318 mononuclear cells (PBMC) from healthy adult volunteers and surgical lung  
319 tissue samples isolated from lung cancer patients and measured basal  
320 IFITM3 expression on key immune cell subsets. The lung tissue was taken  
321 from a para-tumour samples and deemed to show no signs of inflammation by  
322 a pathologist.

323 To determine whether cell origin affects IFITM3 basal expression, cell  
324 subsets were grouped according to their lineage (**Figure 1c**). For adult blood  
325 there was significantly higher basal IFITM3 expression in myeloid cells  
326 compared to lymphoid cells ( $p=0.0235$ ). This higher expression in myeloid  
327 cells compared to lymphoid was replicated in lung tissue samples ( $p<0.0001$ ).

328 The basal expression of IFITM3 in lung epithelial cells was shown to be highly  
329 variable between patients, but still showed significantly higher expression than  
330 that of lymphocytes ( $p=0.0438$ ), and a comparable average expression level  
331 to that of myeloid cells.

332 Analysis of individual immune cell subsets showed that CD16<sup>+</sup>  
333 monocytes have a considerably higher level of IFITM3 expression than other  
334 cell types in adult blood (**Figure 1d**). In lung tissue this level was reduced in  
335 the CD16<sup>+</sup> monocytes to a level that was comparable to CD14<sup>+</sup> monocytes  
336 and similar to dendritic cell (DC) populations (pDC were not detected in lung  
337 samples) (**Figure 1d**). CD14<sup>+</sup> monocytes had higher expression of IFITM3 in  
338 the lung than blood. Natural Killer (NK) cells showed a slightly increased level  
339 of IFITM3 expression in the lung compared to that seen in adult blood. This  
340 suggests that there are tissue-specific changes in IFITM3 expression.

341 From the lung tissue samples we were able to identify the additional  
342 cell populations of basophils, eosinophils, lung-resident macrophages and  
343 epithelial cells. The granulocyte populations consistently had the highest level  
344 of IFITM3 expression in lung tissue samples. Lung-resident macrophages  
345 expressed a lower level of IFITM3 expression than monocytes. Epithelial  
346 cells had a level of IFITM3 similar to the monocytes detected in the lung. This  
347 suggests that cellular lineage as well as where a cell is located are  
348 determinates of IFITM3 expression levels.

349

### 350 ***Basal IFITM3 expression varies due to differentiation state in primary*** 351 ***cord blood cells***

352 As previously suggested (4), IFITM3 expression in haematopoietic stem cells  
353 (HSC) and progenitors was significantly higher than expression in  
354 lymphocytes ( $p=0.0491$ ) (**Figure 1e**). However, no differences were seen in  
355 expression levels when comparing myeloid and progenitor cell groups,  
356 suggesting that the IFITM3 expression pattern is more complicated than  
357 previously thought. The expression pattern on most immune cell subsets was  
358 comparable between adult and cord blood samples, with the highest  
359 expression by CD16<sup>+</sup> monocytes (**Figure 1e**). In general, IFITM3 expression  
360 was higher in cord blood samples than comparable populations in adult blood  
361 samples suggesting that naïve cells may have higher expression of IFITM3.

362 As opposed to IFITM3 expression gradually reducing with increased  
363 differentiation, we saw a distinct pattern of IFITM3 expression across the HSC  
364 differentiation pathway (**Figure 2**). This suggests that while differentiation  
365 state is a determinate of basal IFITM3 expression it is not a linear correlation.

366

367 ***The pattern of IFITM3 expression is not replicated by other ISGs***

368 As an ISG, it is possible that the pattern of IFITM3 expression seen above is  
369 standard for all ISGs. To investigate this, we measured expression levels of  
370 STAT1 and BST2 in the same samples as above. STAT1 and BST2, in the  
371 same way as IFITM3, were previously reported to be expressed highly in stem  
372 cells with expression lost following differentiation (4). STAT1 is a transcription  
373 factor (20) and thus acted as an intracellular control against IFITM3. BST2, or  
374 tetherin, tethers viruses (including IAV) to the cell surface to prevent viral  
375 release and increase restriction of enveloped viruses (21).

376 The expression pattern of both STAT1 and BST2 differed considerably  
377 compared to IFITM3 expression, with the highest expression of both STAT1  
378 and BST2 in adult blood seen in the pDC population (**Figure 3a**).  
379 Additionally, STAT1 was expressed at the lowest level in CD16<sup>+</sup> monocytes.  
380 However, there was significantly higher expression on myeloid cells compared  
381 to lymphoid cells for STAT1 ( $p=0.0227$ ).

382 STAT1 expression in lung tissue samples was reduced compared to  
383 adult blood, with significantly lower expression in lymphoid cells compared to  
384 both myeloid cells ( $p<0.0001$ ) and epithelial cells ( $p=0.0023$ ) (**Figure 3b**).  
385 BST2 expression was significantly higher in myeloid cells compared to  
386 lymphoid ( $p=0.0037$ ) in lung samples, mostly driven by the very high  
387 expression seen in the two granulocyte populations.

388 In general, progenitor cells, and in particular HSC, showed higher  
389 expression of STAT1 than myeloid (n.s.) or lymphoid ( $p=0.0077$ ) cells (**Figure**  
390 **3c**). BST2 expression in cord blood was barely detectable in lymphoid cells  
391 leading to significantly higher expression in both myeloid cells ( $p=0.0123$ ) and  
392 progenitor cells ( $p=0.0063$ ). Taken together this data suggests that the  
393 expression pattern seen for IFITM3 is unique.

394

395 ***Increased IFITM3 expression increases the control of influenza A virus***  
396 ***infection***

397 To confirm that the level of expression of IFITM3 is an important determinant  
398 of viral control, we stimulated HEK293 cells with IFN for 24 hours prior to  
399 infection with influenza A pseudotyped virus (S-FLU PR8:H1N1). IFITM3  
400 expression was measured prior to infection (**Figure 4a**). IFN- $\alpha$  and IFN- $\beta$   
401 significantly increased IFITM3 expression as compared to the unstimulated  
402 WT cells ( $p=0.0024$  and  $p=0.0013$ , respectively). IFN- $\lambda$  induced a modest  
403 increase in IFITM3 levels, while IFN- $\gamma$  had little effect.

404 Following S-FLU PR8:H1N1 infection of these cells for 24 hours, the  
405 percentage of GFP<sup>+</sup> cells was measured, and an infection rate was calculated  
406 by comparing the percentage of infected cells compared to the number of  
407 wild-type (WT) unstimulated cells that were infected (**Figure 4b**). Infection  
408 levels were reduced in HEK293-WT cells following significant IFITM3 up-  
409 regulation (ie. Type I IFN induction). IFN $\gamma$  had a modest effect on infection  
410 rates and IFN $\lambda$  had no impact on influenza infection.

411 However, IFITM3 is not the only anti-viral mechanism induced by IFN  
412 stimulation. We therefore investigated the infection rates of IFN-stimulated  
413 HEK293-IFITM3<sup>-/-</sup> cells. As expected, the infection rate was substantially  
414 higher in IFITM3<sup>-/-</sup> cells with no IFN stimulation, but following type I IFN  
415 stimulation the infection rate was attenuated to levels comparable to or lower  
416 than those seen in un-stimulated HEK293-WT but not as low as in IFN-treated  
417 HEK293-WT cells (**Figure 4b**). This data suggests that IFITM3 contributed to  
418 type I IFN mediated control in cells where IFITM3 was substantially  
419 upregulated upon IFN stimulation.

420

421 To investigate the association between IFITM3 expression levels and  
422 infection rates, we re-introduced IFITM3 into HEK293-IFITM3<sup>-/-</sup> cells using  
423 plasmid transfection at different concentrations prior to infection with S-FLU  
424 PR8:H1N1 (**Figure 4c**). As the percentage of IFITM3<sup>+</sup> cells increased, the  
425 level of GFP<sup>+</sup> (i.e. cells with replicating virus) was reduced. In fact, when we  
426 looked at the correlation between IFITM3<sup>+</sup> and GFP<sup>+</sup> cells we saw a  
427 significant inverse correlation between these levels ( $R^2=0.4730$ ,  $p=0.0046$ )

428 **(Figure 4d).** This data confirms that the expression level of IFITM3 is  
429 important in the control of viral infection.

430

#### 431 ***IFITM3 induction favours Type I IFN***

432 To investigate the induction of IFITM3 by IFN we used the cell lines HEK293  
433 and A549 to measure IFITM3 expression following stimulation with IFN up to  
434 a concentration of 10,000 U/ml **(Figure 5a-b)**. As shown above, type I IFN  
435 induced the highest expression of IFITM3. In HEK293 cells, IFN- $\lambda$  induced a  
436 modest increase in IFITM3 but IFN- $\gamma$  had a minimal effect even at very high  
437 concentrations. While in A549 cells IFN- $\lambda$  and IFN- $\gamma$  induced similar levels of  
438 IFITM3, but this was still attenuated compared to IFN- $\alpha$  and IFN- $\beta$ . Induction  
439 in both cell types starts to plateau at concentrations of IFN >1000 U/ml.

440 Previous reports have shown that IFITM3 can be induced by type II IFN  
441 (2), but we have seen minimal induction of IFITM3. To confirm that our  
442 recombinant IFN- $\gamma$  was functional we measured PDL1 expression in our A549  
443 cells following stimulation and saw a marked increase in expression (data not  
444 shown), suggesting that the lack of induction of IFITM3 is not due to  
445 dysfunctional IFN- $\gamma$  stimulation.

446 To confirm this pattern of IFITM3 induction in our primary cells, we  
447 stimulated human adult blood cells with Type I, II and III IFN for 48 hours prior  
448 to measurement of IFITM3 expression by mass cytometry. Initially, we looked  
449 at the level of IFITM3 induction in the total PBMC population and found that,  
450 consistent with the cell lines, only IFN $\alpha$  and IFN $\beta$  induced a significant  
451 increase in IFITM3 expression ( $p=0.0241$  and  $p=0.0235$ , respectively) **(Figure**  
452 **5c)**.

453 When we focused on the myeloid and lymphoid populations, we found  
454 that the expression of IFITM3 was significantly higher in myeloid cells  
455 compared to lymphoid for all IFN stimulations (No IFN  $p=0.0011$ ; IFN- $\alpha$   
456  $p<0.0001$ ; IFN- $\beta$   $p<0.0001$ ; IFN- $\gamma$   $p=0.0009$ ; IFN- $\lambda$   $p<0.0001$ ) **(Figure 5d)**.  
457 Suggesting that IFN stimulation cannot increase lymphoid cell expression to a  
458 similar level as that seen in myeloid cells.

459 Separating this into individual cell types and comparing the fold change  
460 in IFITM3 expression as compared to unstimulated samples, we found that



461 CD14<sup>+</sup> monocytes, CD1c<sup>+</sup> DC and pDC can induce more than 3-fold increase  
462 in IFITM3 expression following Type I IFN stimulation (**Figure 5e**). . NK and B  
463 cells also increased expression of IFITM3 modestly following type I IFN  
464 stimulation. CD16<sup>+</sup> monocytes show a very small increase in expression  
465 following IFN stimulation suggesting that their basal expression is near  
466 maximum. Minimal induction of IFITM3 was seen in T cells following type I  
467 IFN stimulation.

468 As seen in the cell lines, only moderate increases in IFITM3 expression  
469 were observed in the CD14<sup>+</sup> monocyte and CD1c<sup>+</sup> DC populations following  
470 type II IFN stimulation (IFN- $\gamma$ ) (**Figure 5e**). Type III IFN (IFN- $\lambda$ 3), was found  
471 to induce IFITM3 expression considerably in pDC cells only as no other  
472 immune cell is known to express the receptor for this IFN. It has previously  
473 been reported that pDC can secrete IFN- $\lambda$  and respond to the cytokine in an  
474 autocrine manner to increase anti-viral responses (22). Here we show that  
475 IFITM3 can be induced by type III IFN to a level similar to the induction with  
476 Type I IFN but minimal induction is seen following IFN- $\gamma$  stimulation.  
477 Additionally, T cells do not increase IFITM3 expression following any IFN  
478 stimulation.

479

#### 480 ***Maximal IFITM3 expression takes 24-36 hours***

481 Low basal expression of IFITM3 may make some immune cells more at risk of  
482 viral infection than others. From the lung samples above we showed that  
483 lung-resident macrophages and epithelial cells have low basal expression of  
484 IFITM3 that may make them more susceptible to IAV infection in the early  
485 stages of infection. Rapid induction of higher IFITM3 expression following  
486 infection is likely to be required for complete viral control.

487 To investigate the time required for IFITM3 induction following IFN  
488 stimulation, we measured IFITM3 expression across 72 hours following IFN  
489 stimulation (**Figure 6**). In both HEK293 (**Figure 6a**) and A549 (**Figure 6b**)  
490 cells, maximal expression of IFITM3 was found at 24-36 hours post-IFN  
491 stimulation. This maximal expression time was similar for all IFNs except IFN-  
492  $\lambda$  where expression continued to increase until around 60 hours. After this  
493 time IFITM3 expression began to reduce for all IFNs, with maximal expression



494 not retained for long. This suggests that IFITM3 may not be a first line of  
495 defence against virus infection in cells with low basal expression.

496

## 497 **Discussion**

498 Influenza virus infection remains one of the ten biggest threats to human  
499 health (WHO report). The IFN-inducible protein IFITM3 can restrict influenza  
500 virus infection *in vitro* settings but most, if not all, unvaccinated individuals will  
501 become infected with influenza if they come into contact with the virus. The  
502 immune response to influenza is sufficient to clear the virus in most cases but  
503 not before individuals succumb to illness. The discrepancy between the *in*  
504 *vitro* and *in vivo* abilities to restrict influenza virus infection led us to  
505 investigate the expression pattern of IFITM3 on a range of human cell lines  
506 and primary samples.

507 We found large variability in the basal expression of IFITM3 on different  
508 cell types, with higher expression consistently on myeloid cells compared to  
509 lymphoid. Minimal variability in this pattern is apparent with strong clustering  
510 between expression levels in multiple donors, suggesting that the pattern  
511 seen here is robust and reproducible. This combined with the data from the  
512 iPSC cells naturally and following differentiation into macrophages, strongly  
513 suggests that the cell type and lineage alters basal IFITM3 levels.

514 In general, IFITM3 expression in lung tissue samples was higher than  
515 the corresponding populations in adult blood which would suggest that there  
516 may be some evidence of inflammation in these para-tumour samples.  
517 However, the reduction in expression of the CD16<sup>+</sup> monocytes in lung tissue  
518 compared to blood suggests that this cannot be the case as this population  
519 would either remain high or be increased. This suggests that the tissue  
520 locality of the cells can also influence basal IFITM3 expression levels.

521 The expression pattern of IFITM3 on the cord blood cells and  
522 progenitor populations suggest that differentiation state influences IFITM3  
523 expression. However, this is not a linear correlation with some mature  
524 populations expressing the same level as HSC or progenitor populations.  
525 Additionally, we saw higher expression of IFITM3 on cells isolated from cord  
526 blood compared to adult blood, especially in the myeloid compartment. This  
527 suggests that more naïve cells may have higher basal levels of IFITM3 and

528 this is reduced following infection. This is in contrast to reports that CD8+ T  
529 cells in mice can retain IFITM3 expression following influenza infection (3).  
530 This could be important for the clearance of viral infection as it shows that  
531 prior infection does not increase the efficacy of IFITM3 viral restriction during  
532 subsequent infections.

533 We consistently saw very low basal expression of IFITM3 on  
534 lymphocytes, in particular T cells, which could not be increased by stimulation  
535 with IFNs. This implies that IFITM3 may not play a major role in restricting  
536 virus replication in T cells. This is supported by data showing that CD8 T cell  
537 depletion has no effect on weight loss or viral load following IAV infection of  
538 WT or *Ifitm3*<sup>-/-</sup> mice (unpublished observations by Prof. Ian Humphreys).  
539 Alternatively, it may be that other mechanisms can induce IFITM3 expression  
540 in T cells, such as T cell activation through CD3/CD28 (23). Low IFITM3  
541 expression in T cells could potentially explain why CD4 T cells become  
542 chronically infected by HIV-1 despite evidence that IFITM3 can restrict HIV-1  
543 (9, 24). Additionally, our data may explain why depletion of IFITM3 in CD4 T  
544 cells had no effect on HIV-1 infection rates in previous experiments (1).

545 We found that IFITM3 is preferentially induced by type I IFN. Here we  
546 show that type III IFN can also induce high IFITM3 expression in certain cell  
547 types, although to a lesser extent than after type I IFN treatment. We were  
548 unable to show that IFITM3 expression can be significantly induced by type II  
549 IFN and only saw modest increases in expression following stimulation.  
550 Previous studies into IFITM3 induction that contradict this data were  
551 performed in a murine setting suggesting that there could be species-specific  
552 differences in type II-IFN induction of IFITM3 (2).

553 The requirement for high IFITM3 expression for stronger viral  
554 resistance in influenza infection was previously known (1); we show it here in  
555 the context of IFITM3 IFN induction and reconstitution experiments. The  
556 correlation of IAV infection rates coupled with our IFITM3 expression pattern  
557 data raises a clear point that some cells that have low basal IFITM3  
558 expression may be at risk of influenza infection. Further analysis of the  
559 minimal level of IFITM3 required to restrict infection is ongoing. This could  
560 provide increased understanding of viral tropism and viral control in certain  
561 cell types. For example, CD4<sup>+</sup> T cells have very low IFITM3 expression,

562 cannot induce IFITM3 after IFN stimulation and are the target cells of HIV-1  
563 infection, which is generally a chronic infection.

564 Another important factor is the time it takes for IFITM3 to be induced  
565 following IFN stimulation. We found that in cell lines it takes around 36 hours  
566 to reach maximal IFITM3 expression, a relatively slow rate for an ISG which  
567 are usually induced rapidly within 12 hours. This is in agreement with a paper  
568 recently published showing that ISGs can be grouped into four groups, those  
569 that are induced within 3 hours, 6 hours, 12 hours or take 24 hours. IFITM3  
570 was within the 24 hour group, at which point the experiment was stopped (25).  
571 This delay in IFITM3 expression following IFN induction further increases the  
572 risk of infection in cells with low IFITM3 basal expression, even if they can  
573 then induce IFITM3 following IFN stimulation. This suggests that, in some  
574 cases, IFITM3 is not a first line of defence against viral infection.

575 Other than viral restriction, IFITM3 has additional roles in cytokine  
576 production. It has been shown to restrict cytokine production in murine  
577 cytomegalovirus infection to prevent overt pathology caused by infection (26).  
578 In this setting, IFITM3 was most apparent in reducing IL-6 release from  
579 myeloid cells. The data shown here supports the strong effect of IFITM3 in  
580 myeloid cells and will help to continue the studies into the role of IFITM3 in  
581 this setting.

582 Taken together, the data presented here shows that the IFITM3  
583 expression pattern is influenced by cell type, location, differentiation state and  
584 naivety with high variability possible. However, what is clear is that basal  
585 IFITM3 expression is higher on myeloid than lymphoid cells and induction  
586 mostly occurs in these cells following IFN stimulation, although this induction  
587 can take up to 24 hours for marked increase in expression. The data here will  
588 provide important information for the study of IFITM3 viral restriction in several  
589 infection settings as well as aiding in research of the role of IFITM3 in cancer  
590 and cytokine production.

591

## 592      **References**

- 593      1.      Brass AL, Huang IC, Benita Y, John SP, Krishnan MN, Feeley EM, Ryan B,  
594              Weyer JL, van der Weyden L, Fikrig E, Adams DJ, Xavier RJ, Farzan M,  
595              Elledge SJ. 2009. IFITM Proteins Mediate the Innate Immune Response to  
596              Influenza A H1N1 Virus, West Nile Virus and Dengue Virus. *Cell* 139:1243-  
597              54.
- 598      2.      Bailey CC, Huang IC, Kam C, Farzan M. 2012. Ifitm3 limits the severity of  
599              acute influenza in mice. *PLoS Pathog* 8:e1002909.
- 600      3.      Wakim LM, Gupta N, Mintern JD, Villadangos JA. 2013. Enhanced survival  
601              of lung tissue-resident memory CD8(+) T cells during infection with  
602              influenza virus due to selective expression of IFITM3. *Nat Immunol*  
603              14:238-45.
- 604      4.      Wu X, Dao Thi VL, Huang Y, Billerbeck E, Saha D, Hoffmann H-H, Wang Y,  
605              Silva LAV, Sarbanes S, Sun T, Andrus L, Yu Y, Quirk C, Li M, MacDonald MR,  
606              Schneider WM, An X, Rosenberg BR, Rice CM. Intrinsic Immunity Shapes  
607              Viral Resistance of Stem Cells. *Cell* 172:423-438.e25.
- 608      5.      Uhlen M, Fagerberg L, Hallstrom BM, Lindskog C, Oksvold P, Mardinoglu  
609              A, Sivertsson A, Kampf C, Sjostedt E, Asplund A, Olsson I, Edlund K,  
610              Lundberg E, Navani S, Szigyarito CA, Odeberg J, Djureinovic D, Takanen JO,  
611              Hober S, Alm T, Edqvist PH, Berling H, Tegel H, Mulder J, Rockberg J,  
612              Nilsson P, Schwenk JM, Hamsten M, von Feilitzen K, Forsberg M, Persson  
613              L, Johansson F, Zwahlen M, von Heijne G, Nielsen J, Ponten F. 2015.  
614              Proteomics. Tissue-based map of the human proteome. *Science*  
615              347:1260419.
- 616      6.      Wu C, Jin X, Tsueng G, Afrasiabi C, Su AI. 2016. BioGPS: building your own  
617              mash-up of gene annotations and expression profiles. *Nucleic Acids Res*  
618              44:D313-6.
- 619      7.      Huang IC, Bailey CC, Weyer JL, Radoshitzky SR, Becker MM, Chiang JJ,  
620              Brass AL, Ahmed AA, Chi X, Dong L, Longobardi LE, Boltz D, Kuhn JH,  
621              Elledge SJ, Bavari S, Denison MR, Choe H, Farzan M. 2011. Distinct  
622              patterns of IFITM-mediated restriction of filoviruses, SARS coronavirus,  
623              and influenza A virus. *PLoS Pathog* 7:e1001258.
- 624      8.      Feeley EM, Sims JS, John SP, Chin CR, Pertel T, Chen LM, Gaiha GD, Ryan BJ,  
625              Donis RO, Elledge SJ, Brass AL. 2011. IFITM3 inhibits influenza A virus  
626              infection by preventing cytosolic entry. *PLoS Pathog* 7:e1002337.
- 627      9.      Compton AA, Bruel T, Porrot F, Mallet A, Sachse M, Euvrard M, Liang C,  
628              Casartelli N, Schwartz O. 2014. IFITM proteins incorporated into HIV-1  
629              virions impair viral fusion and spread. *Cell Host Microbe* 16:736-47.
- 630      10.      Everitt AR, Clare S, Pertel T, John SP, Wash RS, Smith SE, Chin CR, Feeley  
631              EM, Sims JS, Adams DJ, Wise HM, Kane L, Goulding D, Digard P, Anttila V,  
632              Baillie JK, Walsh TS, Hume DA, Palotie A, Xue Y, Colonna V, Tyler-Smith C,  
633              Dunning J, Gordon SB, Gen II, Investigators M, Smyth RL, Openshaw PJ,  
634              Dougan G, Brass AL, Kellam P. 2012. IFITM3 restricts the morbidity and  
635              mortality associated with influenza. *Nature* 484:519-23.
- 636      11.      Taubenberger JK, Morens DM. 2008. The Pathology of Influenza Virus  
637              Infections. *Annu Rev Pathol* 3:499-522.
- 638      12.      Klatzmann D, Barre-Sinoussi F, Nugeyre MT, Danquet C, Vilmer E, Griscelli  
639              C, Brun-Veziret F, Rouzioux C, Gluckman JC, Chermann JC, et al. 1984.

- 640 Selective tropism of lymphadenopathy associated virus (LAV) for helper-  
641 inducer T lymphocytes. *Science* 225:59-63.
- 642 13. Masur H, Ognibene FP, Yarchoan R, Shelhamer JH, Baird BF, Travis W,  
643 Suffredini AF, Deyton L, Kovacs JA, Falloon J, et al. 1989. CD4 counts as  
644 predictors of opportunistic pneumonias in human immunodeficiency  
645 virus (HIV) infection. *Ann Intern Med* 111:223-31.
- 646 14. Wu SJ, Grouard-Vogel G, Sun W, Mascola JR, Brachtel E, Putvatana R,  
647 Louder MK, Filgueira L, Marovich MA, Wong HK, Blauvelt A, Murphy GS,  
648 Robb ML, Innes BL, Birx DL, Hayes CG, Frankel SS. 2000. Human skin  
649 Langerhans cells are targets of dengue virus infection. *Nat Med* 6:816-20.
- 650 15. Rodenhuis-Zybert IA, Wilschut J, Smit JM. 2010. Dengue virus life cycle:  
651 viral and host factors modulating infectivity. *Cell Mol Life Sci* 67:2773-86.
- 652 16. Makvandi-Nejad S, Laurenson-Schafer H, Wang L, Wellington D, Zhao Y,  
653 Jin B, Qin L, Kite K, Moghadam HK, Song C, Clark K, Hublitz P, Townsend  
654 AR, Wu H, McMichael AJ, Zhang Y, Dong T. 2017. Lack of Truncated  
655 IFITM3 Transcripts in Cells Homozygous for the rs12252-C Variant That  
656 is Associated With Severe Influenza Infection. *J Infect Dis*  
657 doi:10.1093/infdis/jix512.
- 658 17. Leha A, Moens N, Meleckyte R, Culley OJ, Gervasio MK, Kerz M, Reimer A,  
659 Cain SA, Streeter I, Folarin A, Stegle O, Kielty CM, Durbin R, Watt FM,  
660 Danovi D. 2016. A high-content platform to characterise human induced  
661 pluripotent stem cell lines. *Methods* 96:85-96.
- 662 18. Hale C, Yeung A, Goulding D, Pickard D, Alasoo K, Powrie F, Dougan G,  
663 Mukhopadhyay S. 2015. Induced Pluripotent Stem Cell Derived  
664 Macrophages as a Cellular System to Study Salmonella and Other  
665 Pathogens. *PLOS ONE* 10:e0124307.
- 666 19. van Wilgenburg B, Browne C, Vowles J, Cowley SA. 2013. Efficient, long  
667 term production of monocyte-derived macrophages from human  
668 pluripotent stem cells under partly-defined and fully-defined conditions.  
669 *PLoS One* 8:e71098.
- 670 20. Ramana CV, Chatterjee-Kishore M, Nguyen H, Stark GR. 2000. Complex  
671 roles of Stat1 in regulating gene expression. *Oncogene* 19:2619-27.
- 672 21. Evans DT, Serra-Moreno R, Singh RK, Guatelli JC. 2010. BST-2/tetherin: a  
673 new component of the innate immune response to enveloped viruses.  
674 *Trends Microbiol* 18:388-96.
- 675 22. Yin Z, Dai J, Deng J, Sheikh F, Natalia M, Shih T, Lewis-Antes A, Amrute SB,  
676 Garrigues U, Doyle S, Donnelly RP, Kotenko SV, Fitzgerald-Bocarsly P.  
677 2012. Type III IFNs are produced by and stimulate human plasmacytoid  
678 dendritic cells. *J Immunol* 189:2735-45.
- 679 23. Bedford JG, O'Keeffe M, Reading PC, Wakim LM. 2019. Rapid interferon  
680 independent expression of IFITM3 following T cell activation protects  
681 cells from influenza virus infection. *PLOS ONE* 14:e0210132.
- 682 24. Lu J, Pan Q, Rong L, He W, Liu SL, Liang C. 2011. The IFITM proteins  
683 inhibit HIV-1 infection. *J Virol* 85:2126-37.
- 684 25. Pervolaraki K, Rastgou Talemi S, Albrecht D, Bormann F, Bamford C,  
685 Mendoza JL, Garcia KC, McLauchlan J, Hofer T, Stanifer ML, Boulant S.  
686 2018. Differential induction of interferon stimulated genes between type I  
687 and type III interferons is independent of interferon receptor abundance.  
688 *PLoS Pathog* 14:e1007420.

- 689 26. Stacey MA, Clare S, Clement M, Marsden M, Abdul-Karim J, Kane L,  
690 Harcourt K, Brandt C, Fielding CA, Smith SE, Wash RS, Brias SG, Stack G,  
691 Notley G, Cambridge EL, Isherwood C, Speak AO, Johnson Z, Ferlin W,  
692 Jones SA, Kellam P, Humphreys IR. 2017. The antiviral restriction factor  
693 IFN-induced transmembrane protein 3 prevents cytokine-driven CMV  
694 pathogenesis. *J Clin Invest* 127:1463-1474.  
695  
696



697 **Figures**

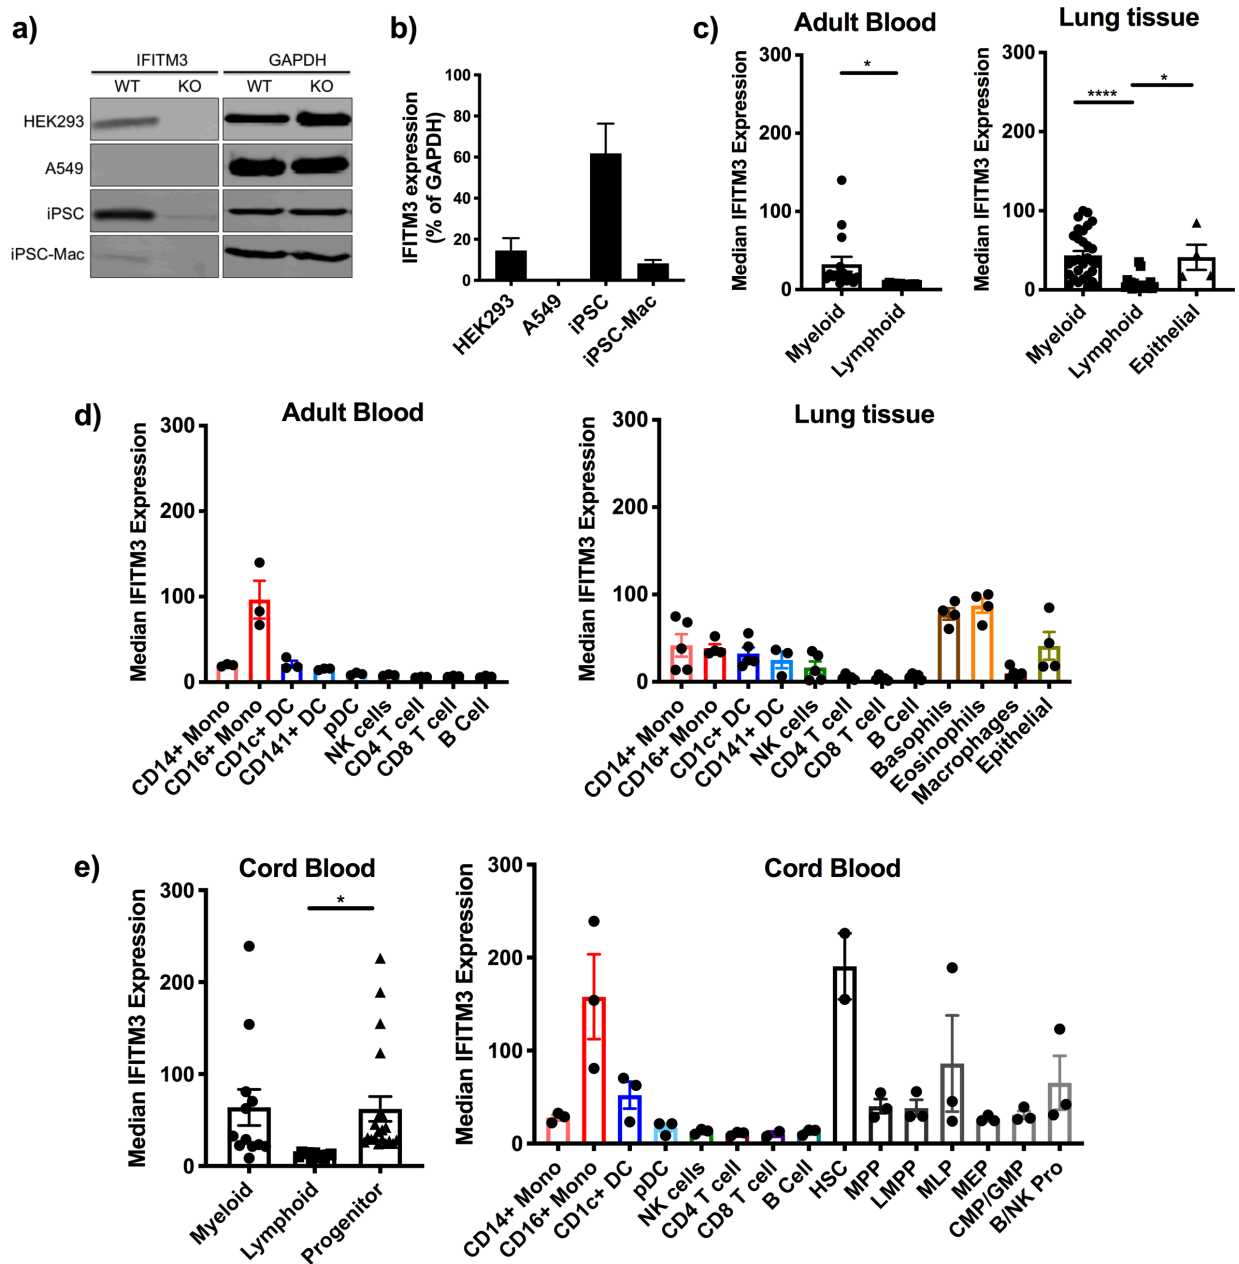

698 **Figure 1: Basal IFITM3 expression varies in both cell lines and primary**  
 699 **cells**

700 (a) WT and *IFITM3*<sup>-/-</sup> cells were probed for IFITM3 and GAPDH expression by  
 701 western blot. (b) Basal IFITM3 expression is shown as a percentage of  
 702 GAPDH expression as measured by western blot in cell lines. (c) IFITM3  
 703 basal expression was measured in adult blood PBMC and lung para-tumour  
 704 tissue samples by mass cytometry. Comparison of expression analysed by  
 705 one-way ANOVA. (d) Basal IFITM3 expression shown by individual cell types.  
 706 (e) Basal IFITM3 expression in cord blood samples. Progenitor populations  
 707 investigated were hematopoietic stem cells (HSC), multipotent progenitor  
 708 (MPP), lymphoid-primed multipotent progenitors (LMPP), multi-lymphoid  
 709 progenitor (MLP), megakaryocyte erythroid progenitor (MEP), common



710 myeloid progenitor (CMP) / granulocyte-monocyte progenitors (GMP) and B  
711 cell + NK cell progenitor (B/NK Pro). Data is expressed  $\pm$ SEM. Adult blood  
712 donors n=3, lung tissue samples n=5, cord blood samples n=3, cell line data  
713 n=3. \*p<0.05, \*\*p<0.01, \*\*\*p<0.001, \*\*\*\*p<0.0001.

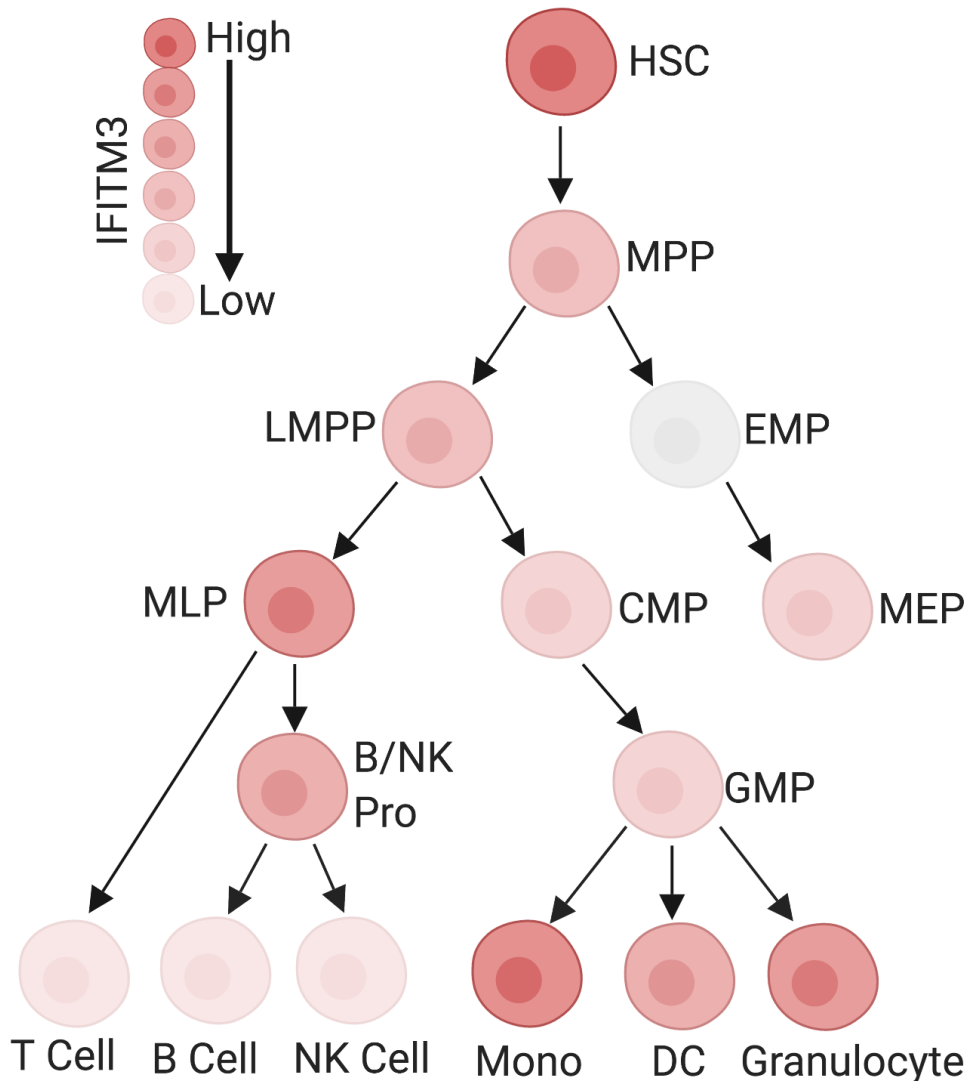

714 **Figure 2: IFITM3 expression variability through haematopoietic stem cell**  
715 **lineage**

716 Basal IFITM3 expression by immune cell subset from haematopoietic stem  
717 cell (HSC) to fully differentiated cells. Multipotent progenitor (MPP), lymphoid-  
718 primed multipotent progenitors (LMPP), multi-lymphoid progenitor (MLP),  
719 Eythro-myeloid progenitors (EMP), megakaryocyte erythroid progenitor  
720 (MEP), common myeloid progenitor (CMP), granulocyte-monocyte progenitors  
721 (GMP), B cell + NK cell progenitor (B/NK Pro), monocytes (Mono), Dendritic  
722 cell (DC). Image created with Biorender.

**a) Adult Blood**

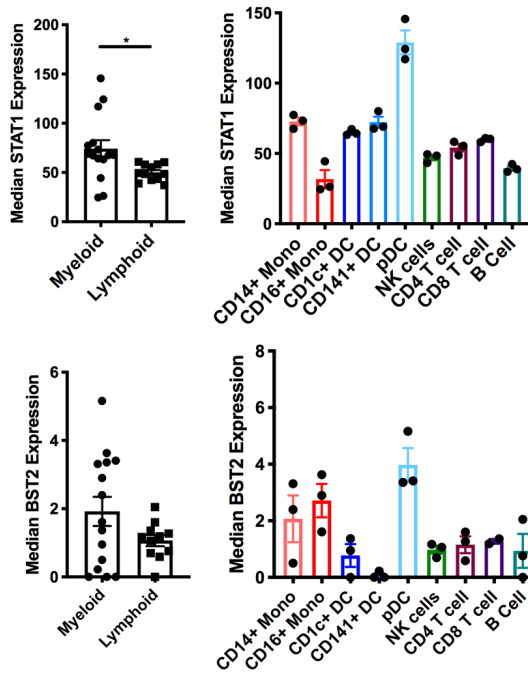

**b) Lung tissue**

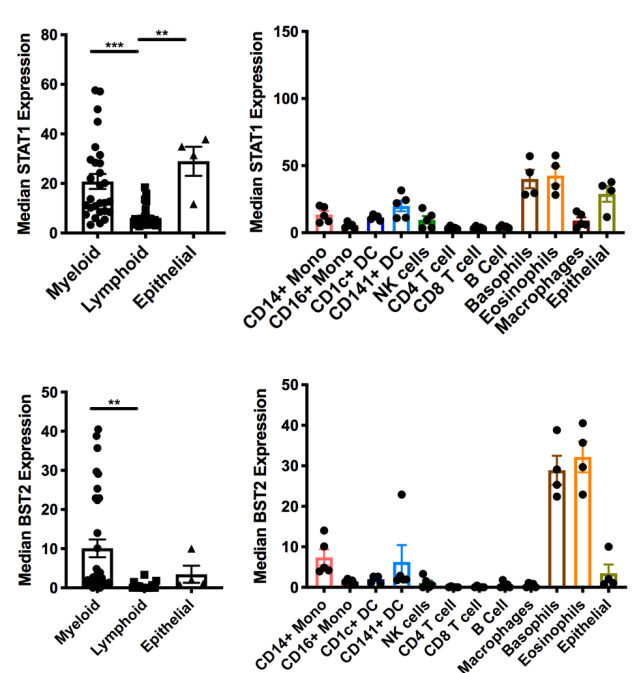

**c) Cord Blood**

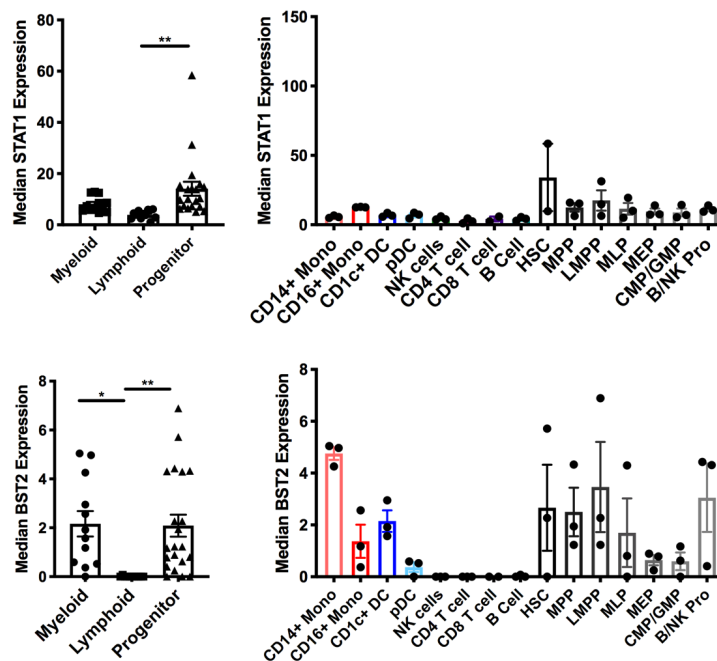

723 **Figure 3: IFITM3 pattern of expression is not replicated in all IFN-**  
 724 **stimulated genes**

725 Expression of STAT1 and BST2 was measured using mass cytometry at the  
 726 same time as IFITM3 expression was determined. (a) Expression on Adult  
 727 blood PBMC samples. (b) Expression on lung para-tumour tissue samples.  
 728 (c) Expression on cord blood samples. Data is expressed  $\pm$ SEM. Adult blood  
 729 donors n=3, lung tissue samples n=5, cord blood samples n=3, cell line data  
 730 n=3. \*p<0.05, \*\*p<0.01, \*\*\*p<0.001, \*\*\*\*p<0.0001.

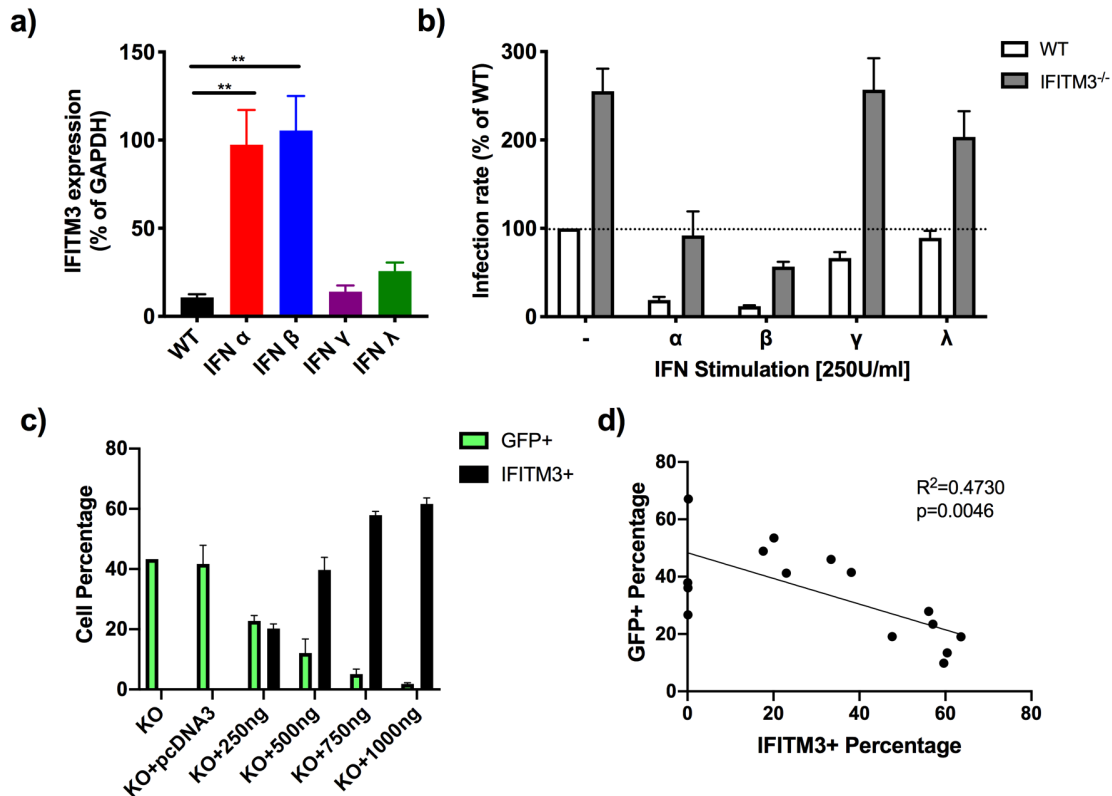

731 **Figure 4: IFITM3 expression level determines IAV infection rate**

732 (a) IFITM3 expression in HEK293 cells following 250 U/ml IFN stimulation for  
 733 24 hours. One-way ANOVA was run to show statistical differences. (b) WT  
 734 and IFITM3<sup>-/-</sup> HEK293 cells were pre-treated with 250 U/ml IFN for 24 hours  
 735 prior to 24 hour infection with influenza virus (S-FLU PR8:H1N1). The  
 736 percentage of infected cells is shown as a percentage of that seen with WT  
 737 HEK293 cells without IFN stimulation. (c) IFITM3-pcDNA3 was transfected  
 738 into HEK293-IFITM3<sup>-/-</sup> cells for 24 hour prior to infection with S-FLU  
 739 PR8:H1N1. The percentage of infected (GFP<sup>+</sup>) cells and the percentage of  
 740 IFITM3<sup>+</sup> cells is shown. (d) Linear correlation of the GFP<sup>+</sup> and IFITM3<sup>+</sup>  
 741 percentages. n=3 for all experiments. Data is expressed  $\pm$ SEM. \*p<0.05,  
 742 \*\*p<0.01, \*\*\*p<0.001, \*\*\*\*p<0.0001.

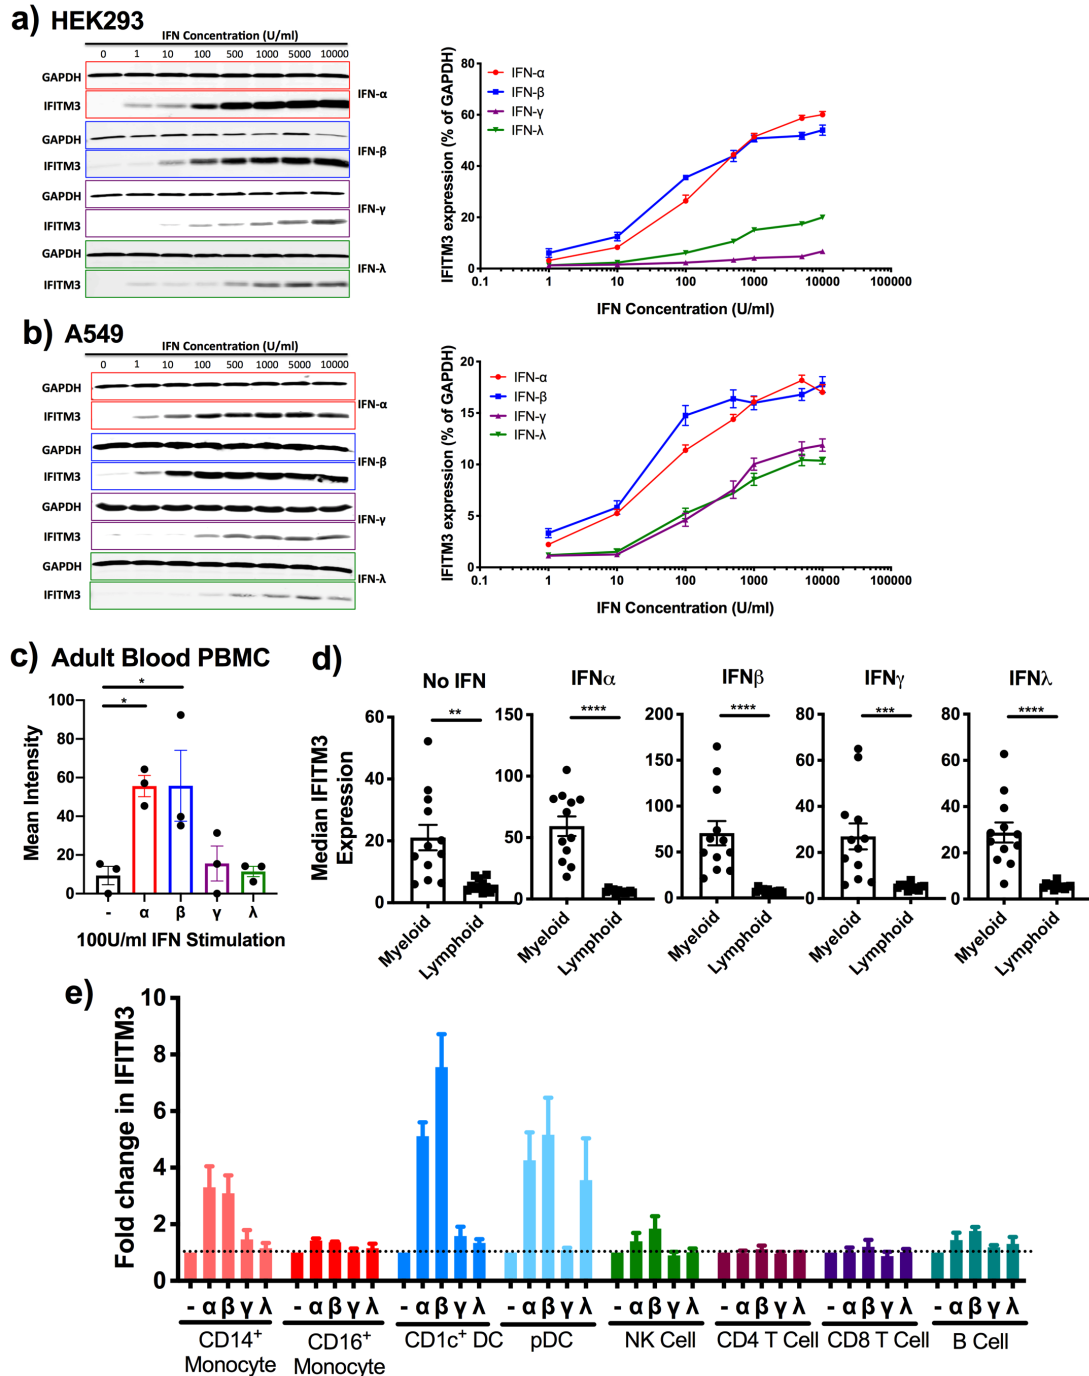

743 **Figure 5: IFITM3 is preferentially induced by Type I IFN**  
 744 (a) Expression of IFITM3 in HEK293 cells following 24 hours IFN stimulation  
 745 measured by Western blot and expressed as a percentage of GAPDH  
 746 expression. (b) Expression of IFITM3 in A549 cells following 24 hours IFN  
 747 stimulation measured by Western blot and expressed as a percentage of  
 748 GAPDH expression. (c) Adult blood PBMC were cultured for 48 hours with  
 749 IFN stimulation prior to measurement of IFITM3 expression by mass  
 750 cytometry. (d) Expression of IFITM3 in myeloid and lymphoid cells following  
 751 IFN stimulation. (e) IFITM3 expression is expressed as a fold change in  
 752 expression compared to the basal level of expression in order to show  
 753 induction. Data is expressed  $\pm$ SEM and analysed by one-way ANOVA.  
 754 \* $p < 0.05$ , \*\* $p < 0.01$ , \*\*\* $p < 0.001$ , \*\*\*\* $p < 0.0001$ . Adult blood donors  $n = 3$ .

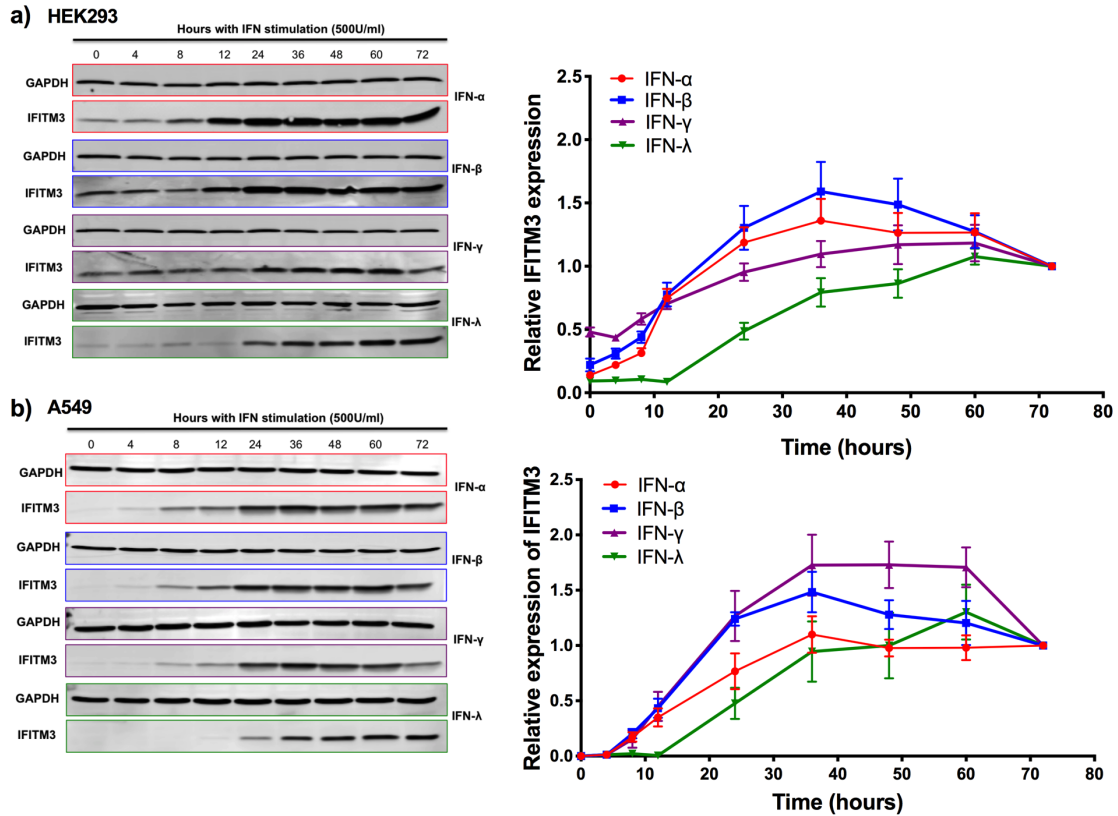

755 **Figure 6: Maximal expression of IFITM3 takes at least 24 hours**

756 (a) Timecourse of IFITM3 expression in HEK293 cells following 500 U/ml IFN  
757 induction measured by western blot and expression as a relative amount of  
758 expression compared to the level recorded at 72 hours. (b) Timecourse of  
759 IFITM3 expression in A549 cells following 500 U/ml IFN induction measured  
760 by western blot and expression as a relative amount of expression compared  
761 to the level recorded at 72 hours.
